# Supplementary material
Source: publisher figshare collection journal article supplement (https://plos.figshare.com/articles/dataset/_/126990)
Supplement: Supplementary file [file 1]

|                               |    |                               |       |             |       |              |       |       |       |                            |       |                    |
|-------------------------------|----|-------------------------------|-------|-------------|-------|--------------|-------|-------|-------|----------------------------|-------|--------------------|
| human NPSR                    | 1  | MPANF                         | ..... | TEGSFDS     | ....  | SGTG         | ..... | QT    | ..... | LDSSPV                     | ..    | ACTETVTFTEVVEGK    |
| chimpanzee NPSR               | 1  | MPANF                         | ..... | TEGSFDS     | ....  | SGTG         | ..... | QT    | ..... | LDSSPV                     | ..    | ACTETVTFTEVVEGK    |
| gorilla NPSR                  | 1  | MPANF                         | ..... | TEGSFDS     | ....  | SGTG         | ..... | QT    | ..... | LDSSPV                     | ..    | ACTETVTFTEVVEGK    |
| marmoset NPSR                 | 1  | MPANF                         | ..... | TESSLDS     | ....  | NGTR         | ..... | QT    | ..... | PDSSPV                     | ..    | ACTETVTFTEVVEGK    |
| orangutan NPSR                | 1  | MPANF                         | ..... | TEGSFDS     | ....  | SGTG         | ..... | QT    | ..... | LDSSPV                     | ..    | ACTETVTFTEVVEGK    |
| macaque NPSR                  | 1  | MPANF                         | ..... | TEGSFDS     | ....  | NGTG         | ..... | QM    | ..... | LDSSPV                     | ..    | ACTETVTFTEVVEGK    |
| horse NPSR                    | 1  | MPANL                         | ..... | TEGSPNS     | ....  | NGTM         | ..... | QT    | ..... | LDSSPV                     | ..    | LCTGTVTFTEVVEGE    |
| cow NPSR                      | 1  | MPANL                         | ..... | TEGSAKS     | ....  | NGTG         | ..... | QA    | ..... | LN                         | ..    | SPV                |
| dog NPSR                      | 1  | MPAHL                         | ..... | AEASPDSSHP  | SGAT  | .....        | ..... | QT    | ..... | LEASPV                     | ..    | LCTETVTFTEVVEGE    |
| giant panda NPSR              | 1  | MPANL                         | ..... | TEGSPDSNDAS | SGTT  | .....        | ..... | QT    | ..... | LDASPV                     | ..    | LCTETVTFTEVVEGE    |
| elephant NPSR                 | 1  | MPANL                         | ..... | TEGSPDS     | ....  | SGTT         | ..... | QM    | ..... | LDSSPA                     | ..    | ACSETVTVTEVVEGE    |
| rat NPSR                      | 1  | MPANL                         | ..... | TEGSFHA     | ....  | NQTV         | ..... | PM    | ..... | LDSSPV                     | ..    | ACTEIVTFTEALVAE    |
| mouse NPSR                    | 1  | MPANL                         | ..... | TEGSFHA     | ....  | NQTV         | ..... | PM    | ..... | LDSSPV                     | ..    | ACTEIVTFTEALVAE    |
| rabbit NPSR                   | 1  | MPANH                         | ..... | TEGSAPS     | ....  | TQST         | ..... | LT    | ..... | QGSSPA                     | ..    | TCTETTFTEVVEGE     |
| mouse lemur NPSR              | 1  | MAAHL                         | ..... | TEGSPNS     | ....  | SGTT         | ..... | QT    | ..... | LDSSPV                     | ..    | ACTETVTVTEVVEGE    |
| bush baby NPSR                | 1  | MPANL                         | ..... | TEGSPNS     | ....  | GGTT         | ..... | QT    | ..... | PAPSLV                     | ..    | ACDITVTFTEVAEGE    |
| guinea pig NPSR               | 1  | MPSHR                         | ..... | PQDHSSI     | ....  | VAQTAPSLDASS | ..... | ..... | ..... | LDAALV                     | ..    | ACTDTVTFTEVVEGE    |
| opossum NPSR                  | 1  | MQVNG                         | ..... | TEGSWAV     | ....  | NGTM         | ..... | EP    | ..... | LDAQPLDTCA                 | ..... | AEVTTSPEGAEQE      |
| megabat NPSR                  | 1  | MPANL                         | ..... | TEGSPNS     | ....  | NGTM         | ..... | QT    | ..... | LDSSTA                     | ..    | TCFPTT             |
| dolphin NPSR*                 | 1  | MPANL                         | ..... | TEGSPKS     | ....  | IGTG         | ..... | QT    | ..... | LD                         | ..    | SPI                |
| chicken NPSR                  | 1  | MEVGP                         | ..... | TAASSSS     | ....  | PAGT         | ..... | GW    | ..... | LDVLTV                     | ..    | TCTDTVTFTEVLEE     |
| zebra finch NPSR              | 1  | MEVNS                         | ..... | TEASSSS     | ....  | QGGT         | ..... | SC    | ..... | LDLTLV                     | ..    | TFTETVTFTEVVAEE    |
| lizard NPSR*                  | 1  | MDSTFIYII                     | ..... | SSSAYKH     | ....  | HSHK         | ..... | QC    | ..... | PFVSK                      | ..    | PCFLYVVVTLYSTYGR   |
| frog NPSR                     | 1  | MQVSF                         | ..... | AEASDFS     | ....  | NTSS         | ..... | GT    | ..... | LNLTLT                     | ..    | NCTSANSSADIEEY     |
| lancelet NPSR-like*           | 1  | MPFFS                         | ..... | .....       | ..... | RYQNRVY      | ..... | QA    | ..... | WALEIV                     | ..    | ALSTVTTTPPF        |
| acorn worm CCAPR-like*        | 1  | MTSKL                         | ..... | NEMKYAA     | ....  | VMGA         | ..... | ..... | ..... | FINTTV                     | ..    | YNNTVNNNSTYDIP     |
| water flea CCAPR <sup>+</sup> | 1  | MGDDD                         | ..... | .....       | ..... | SCLERTW      | ..... | ..... | ..... | FNSDQLAGELN                | ..... | LCPSPSNSTED        |
| mosquito CCAPR                | 1  | MTASKWATIQDNFVIGHDVVSHPALPRTA | ..... | .....       | ..... | .....        | ..... | ..... | ..... | SIVVLPSRSPNTKHAVATRLRPDDDE | ..... | .....              |
| fruitfly CCAPR                | 71 | MLAPT                         | ..... | .....       | ..... | PTTA         | ..... | ..... | ..... | TTAAAAATTSPGDSFQAA         | ..... | AAAAAGDNATSPYAGELD |
| marine worm CCAPR**           | 1  | MLVLV                         | ..... | LSFEPHL     | ....  | .....        | ..... | ..... | ..... | MLLEQFHRNVTSDFIGNLQ        | ..... | .....              |
| limpet CCAPR**                | 1  | MNHHS                         | ..... | .....       | ..... | YKYFSVPLSL   | ..... | VI    | ..... | LINFCL                     | ..    | OCLMEYSYDVILG      |

[illegible]



human NPSR 239 IKS KTY.ETVI...SN...CSDGK...LCSSY.NRGLISKAKIKAIKYSIIILAFICCCWS

chimpanzee NPSR 239 IKS KTY.ETVI...SN...CSDGK...LCSSY.NRGLISKAKIKAIKYSIIILAFVCCWS

gorilla NPSR 239 IKS KTY.ETVI...SN...CSDGK...LCSSY.NRGLISKAKIKAIKYSIIILAFICCCWS

marmoset NPSR 239 IKS KTY.ESVI...SN...CSDGK...LCSSY.NRGPISKAKIKAIKYSIVIILAFICCCWS

orangutan NPSR 240 IKS KTY.ETVI...SN...CSDGK...LCSSY.NRGLISKAKIKAIKYSIIILAFICCCWS

macaque NPSR 239 IKS KTY.ETVI...SN...CSDGK...LCSSY.NRGLISKAKIKAIKYSIVIILAFICCCWS

horse NPSR 239 TKS KAS.ETVI...SN...CSDGK...LCTSY.NRGLISKAKIKAIKYSIVIILAFICCCWS

cow NPSR 238 VKS KAY.ETVI...SN...CSDGK...LCTSY.NRGLISKAKIKAIKYSIVIILAFICCCWS

dog NPSR 242 IKS KAH.ETVI...SN...CSGGK...LCTSY.NRGLISKAKIKAIKYSIVIILAFICCCWS

giant panda NPSR 242 IKS KAH.ETVI...SN...CLDGK...LCTSY.NRGLISKAKIKAIKYSIVIILAFICCCWS

elephant NPSR 239 IKS KAH.DMVI...SN...CSNGK...LCTSY.NRRLISKAKIKAIKYSVVIILAFICCCWS

rat NPSR 240 IKS KAH.ETVI...SN...CSDGE...LCSSY.NRGLISKAKIKAIKYSIVIILAFICCCWS

mouse NPSR 239 MKS KTH.ETVI...SN...CSDGK...LCSSY.NRGLISKAKIKAIKYSIVIILAFICCCWS

rabbit NPSR 239 VKS KAC.ETVN...SN...CSDGK...LCTSY.NRGLISKAKIKAVKYSAAIILAFICCCWS

mouse lemur NPSR 238 IKS KAH.ETVI...SN...CSGGK...LCTSY.NRGLISKAKIKAIKYSIVIILAFICCCWS

bush baby NPSR 239 IKS KAH.DSVI...SN...CSGGK...LCTSY.NRGLISKAKIKAIKYSIVIILAFICCCWS

guinea pig NPSR 245 MKS KAP.ETVI...SN...YSDGK...LCTSY.NRGPISKAKVKAIKYSIVIVLAFICWS

opossum NPSR 240 IKS KAH.DMII...SN...CSBGK...LCSSY.NRGVISKAKIKAIKYSIVIILAFICWS

megabat NPSR 237 MKS KGH.DESI...SN...CSDGK...LCTSY.NRGLISKAKIKAIKYSMVIIILAFICCCWS

dolphin NPSR\* 235 VKS KAH.ETEI...SS...CSDGK...RCTIS.N.GLISKAKINAIKYSIVIILAFICCCWS

chicken NPSR 239 MKS KAQ.AAIV...SS...CTDGK...TSAGYTSRGFISRAKVKAIKYSIVIVLAFALCWS

zebra finch NPSR 239 MKS KAQ.AAII...SS...CPGGK...TSRGYTSRGFISRAKVKAIKYSIVIILAFILCWS

lizard NPSR\* 247 TKS KAH.AIIV...SN...CSDGK...FCTSY.THRGLISKAKIKAVKYSIVIILAFVLCWS

frog NPSR 240 VKS KGH.AVII...SN...YTDGN...FCTSY.SYHRGLISKAKMKAIKYSIVIVLAFILCWS

lancelet NPSR-like\* 227 KRGGKM.AYEDHIPRSR...ASSGKNFYRIFHLHINNFGTSRAKARTIKLSVAIILAFICCCWS

acorn worm NPSR-like\* 236 RKSKMM.VPAK...RRIFN...EKNGD...SRGLIPAKIKTIKMTLCIVLFSVFCWS

water flea CCAPR+ 203 VQSAIF.LGIN...RAGGSAGTAMLDEQE...SRA.SSRGIIPRAKIKTVKMTFVIVLFLCWA

mosquito CCAPR 248 AKGAIM.GPVD...RTRNGMA...DLA...SRA.SSRGIIPRAKIKTVKMTFVIVLFLCWS

fruitfly CCAPR 313 AKGSIF.VPTD...RA.GFG...GAA...TRA.SSRGIIPRAKIKTVKMTLTVFVFLCWS

marine worm CCAPR++ 234 SKNGVS.TTSN...KR...QLSKRGR...ESTT.SSRGMIPKARIKTIKMTFAIVTVFIICVW

limpet CCAPR++ 236 SKQGSRRDGM...ETHNLPR...IGVGSREHMVCRRTNSNRGIIPQAKIKTIKMTLTVIIVFLCWS

| HELIX 8                           |     |                                                                        |
|-----------------------------------|-----|------------------------------------------------------------------------|
| .....Q                            |     |                                                                        |
| human NPSR                        | 344 | .....IRLRQL.....QEAALMLCPQR.....E.NWK.....GTWP                         |
| chimpanzee NPSR                   | 344 | .....IPLRQL.....QEAALTLCPQR.....Q.NWK.....GTWP                         |
| gorilla NPSR                      | 344 | .....NSSVYLLACDVSVLWALVPTSEKESCE.SWRRKGAKITG..FQND                     |
| marmoset NPSR                     | 344 | .....SSTVYLLACDVAVLWGLVLPGGKENCE.SLRRKGAKITG..FQND                     |
| orangutan NPSR                    | 345 | .....RRS.....QDSRMTFRERT.....E.RHE.....MQIL                            |
| macaque NPSR                      | 344 | .....RRS.....QDSRMTFRERT.....E.RHE.....MQIL                            |
| horse NPSR                        | 344 | .....QRS.....QDSRMTYQERT.....E.RHE.....MQVL                            |
| cow NPSR                          | 343 | .....QRS.....RDSRMTCRERT.....E.KHE.....MQVL                            |
| dog NPSR                          | 347 | .....QTS.....RGSRKTFRERT.....Q.RHE.....MQVL                            |
| giant panda NPSR                  | 347 | .....RTS.....RDSRMTFRERT.....Q.RHE.....MQVL                            |
| elephant NPSR                     | 344 | .....RKS.....RDSRMTQERT.....E.RHE.....MQVL                             |
| rat NPSR                          | 345 | .....QRS.....QDSRMTYRERS.....E.RHE.....MQIL                            |
| mouse NPSR                        | 344 | .....QRS.....QDSRMTYRERS.....E.RHE.....MQIL                            |
| rabbit NPSR                       | 344 | .....RRS.....QDSRMTCRERT.....E.RHE.....MQTL                            |
| mouse lemur NPSR                  | 343 | .....RNSVYLLACDASSVHWAVLTSKGEGCE..WRKKGAKITG..FQSD                     |
| bush baby NPSR                    | 341 | .....NSSAYLLAD.DASVLTWVLTSGKEGCE..RKE...AKITG..FQND                    |
| guinea pig NPSR                   | 350 | .....QKS.....QVSRMTCRERS.....E.RHE.....LQFL                            |
| opossum NPSR                      | 345 | .....RRN.....AGGTFQDKT.....E.RHE.....MRMR                              |
| megabat NPSR                      | 343 | .....NSSAYLLAS.AVIHWALVLGSGGK.....AKITG..FQDD                          |
| dolphin NPSR*                     | 339 | .....NSSAYLLASDVSVHWAVLTSRKEGCE..WWG.....                              |
| chicken NPSR                      | 345 | .....RRT.....RRLEGTFRDRS.....DGGQE.....MQVL                            |
| zebra finch NPSR                  | 345 | .....RRT.....QRLGGTFRERS.....DGGQQ.....MQVL                            |
| lizard NPSR*                      | 353 | .....RRR.....SGNLGTFRERT.....E.GQE.....MQVL                            |
| frog NPSR                         | 346 | .....RNS.....GKLGGTIRDKT.....E.GIE.....MQVV                            |
| lancelet NPSR-like*+              | 342 | .....RRA.....LKHFKMLKAFH.....LKNHF.....VEEG                            |
| acorn worm NPSR-like <sup>+</sup> | 339 | .....MVTVVREVLSLMTNIHNRN.....GYSNF.....RNIV                            |
| water flea CCAPR <sup>+</sup>     | 347 | .....ETLTAYNGIWNKTS.....IFPFHFQNGHTI...                                |
| mosquito CCAPR                    | 371 | SPDGGSQGAGMRNGTVLNGNARLQNHNSSDSMRTLTTSLTISQRSC...IRP.SRVVIVERPKAAL..   |
| fruitfly CCAPR                    | 431 | SYRNNSQQN..RCHTV...GRRL..HNSCDSMRTLTTSLTVSRRST...NKANARVIIICERPKNKVITY |
| marine worm CCAPR*+               | 341 | .....ETLSVAIRKLEKLYKKSCTTSSSHLLFQKAPV.....LRVAFT                       |
| limpet CCAPR*+                    | 350 | .....SRLSSCDYSMTQDYESVSVTFTIRLTRELECT.....                             |
| ▲                                 |     |                                                                        |
| .                                 |     |                                                                        |
| human NPSR                        | 369 | GVPSWALPR                                                              |
| chimpanzee NPSR                   | 369 | GVPSWALPR                                                              |
| gorilla NPSR                      | 386 | VPGEN.REA                                                              |
| marmoset NPSR                     | 386 | VPGEN...R                                                              |
| orangutan NPSR                    | 367 | SKPEF...I                                                              |
| macaque NPSR                      | 366 | SKPEF...I                                                              |
| horse NPSR                        | 366 | SKPEF...I                                                              |
| cow NPSR                          | 365 | SKPEF...M                                                              |
| dog NPSR                          | 369 | SKPEF...I                                                              |
| giant panda NPSR                  | 369 | PKPEF...I                                                              |
| elephant NPSR                     | 366 | SKPEF...I                                                              |
| rat NPSR                          | 367 | SKPEF...I                                                              |
| mouse NPSR                        | 366 | SKPEF...I                                                              |
| rabbit NPSR                       | 366 | AKPEF...L                                                              |
| mouse lemur NPSR                  | 384 | IPGED...G                                                              |
| bush baby NPSR                    | 379 | IPREN...R                                                              |
| guinea pig NPSR                   | 372 | SKPEF...I                                                              |
| opossum NPSR                      | 365 | PKPEF...I                                                              |
| megabat NPSR                      | 375 | VPREN...R                                                              |
| dolphin NPSR*                     | 369 | ...R...K                                                               |
| chicken NPSR                      | 368 | SKPEY...I                                                              |
| zebra finch NPSR                  | 368 | SKPEC...I                                                              |
| lizard NPSR*                      | 375 | SKPEY...I                                                              |
| frog NPSR                         | 368 | SRPEY...L                                                              |
| lancelet NPSR-like*+              | 365 | SVFLC...L                                                              |
| acorn worm NPSR-like <sup>+</sup> | 367 | NRAMY...I                                                              |
| water flea CCAPR <sup>+</sup>     | 373 | ..LKK...D                                                              |
| mosquito CCAPR                    | 433 | .AMSQ...V                                                              |
| fruitfly CCAPR                    | 489 | PAMSE...V                                                              |
| marine worm CCAPR*+               | 380 | SLLLV...L                                                              |
| limpet CCAPR*+                    | 383 | .....S                                                                 |

Note: Secondary structure elements marked on top of the alignment correspond to that predicted for the human NPSR sequence. Transmembrane regions are named TM1 to TM7; extracellular and intracellular loops are named ECL1, 2, 3 and ICL1, 2, 3, respectively. The upright triangle symbol in blue corresponds to Type I divergence sites and star symbol in green corresponds to Type II divergence sites. Numbers on the left of the sequences correspond to the amino acid residue position for each sequence. Intron positions are marked in blue boxes. N-terminal region of the fruitfly CCAPR sequence has been trimmed to align with rest of the sequences. Sequences corrected manually at the N and C- termini are represented with \* and + at the end of their sequence names.

Figure S3
